# Supplementary material for: A powerful drug combination strategy targeting glutamine addiction for the treatment of human liver cancer
Source: eLife. 2020 Oct 5;9:e56749. doi: 10.7554/eLife.56749 (PMC7535927; doi:10.7554/eLife.56749)
Supplement: Figure 4—source data 1. [file elife-56749-fig4-data1.xls]

## Sheet: Fig.4a
		SNU398
		Ctr	CB-839 (4 μM)	V-9302 (5 μM)	Combination
		101.63	73.36	82.2	31.33
		97.8	78.33	80.15	23.95
		100.57	77.13	81.7	28.13
		HepG2
		Ctr	CB-839 (8 μM)	V-9302 (10 μM)	Combination
		101.88	69.52	89.64	29.23
		100.54	68.26	90.68	19.54
		99.82	61.51	82.99	23.7
		MHCC97H
		Ctr	CB-839 (0.8 μM)	V-9302 (10 μM)	Combination
		104.24	57.05	74.12	25.82
		100.26	51.08	70.8	37.04
		92.03	57.22	71.12	33.32
		PLC/PRF5
		Ctr	CB-839 (8 μM)	V-9302 (10 μM)	Combination
		102.41	50	69.39	28.26
		100.29	52.28	67.44	33.18
		97.31	52.33	62.64	30.02
		JHH1
		Ctr	CB-839 (8 μM)	V-9302 (5 μM)	Combination
		97.48	81.1	93.13	67.92
		99.17	87.03	95.24	75.37
		103.36	81.12	92.46	64.77
		Huh7
		Ctr	CB-839 (8 μM)	V-9302 (5 μM)	Combination
		100.51	70.49	90.07	69.91
		101.49	67.57	93.19	62.11
		98	65.42	98.06	57.93

## Sheet: Fig.4b
	SNU398														HepG2															MHCC97H															PLC/PRF5
	hours	Ctr			CB-839 (8 μM)			V-9302 (5 μM)			Combination				hours	Ctr			CB-839 (8 μM)			V-9302 (10 μM)			Combination					hours	Ctr			CB-839 (0.8 μM)			V-9302 (10 μM)			Combination					hours	Ctr			CB-839 (8 μM)
	0	5.6875	6.29	6.225	5.73	7.1875	7.2	6.1925	6.0525	5.1675	6.48	6.13	5.2075		0	13.425	15.7	18.85	11.395	11.85	12.125	17.275	15.275	14.475	13	12.425	12.05			0	12.15	12.28	11.08	10.9	10.41	10.83	11.53	10.61	10.49	10.65	10.58	9.86			0	4.305	4.99	4.38	3.0525
	4	6.135	6.84	7.0875	5.99	7.585	7.8825	6.5875	6.62	5.565	6.81	6.4125	5.2775		4	15.4	18.3	21.8	12.35	13.2	13.225	20.2	18.725	17.05	14.075	13.45	12.8			4	14.88	14.63	13.53	13.48	13.4	13.18	13.43	12.56	12.62	12.55	12.35	10.79			4	5.19	5.85	5.6475	3.84
	8	6.3875	6.88	6.8275	5.95	7.775	7.905	6.735	6.6525	5.71	6.88	6.595	5.4		8	16.7	21.5	23.225	12.575	14.075	13.925	23.425	20.15	18.475	14.675	13.95	13			8	14.8	15.7	14.48	13.35	13.4	13.35	14.2	13	13.22	11.68	10.74	10.48			8	6.23	6.12	6.19	4.37
	12	6.805	7.625	7.3225	6.2825	8.2225	8.3225	7.2475	6.9825	6.0725	7.3	6.7575	5.7925		12	19.175	24.325	26.425	13.75	15.175	15.1	25.475	22.325	19.75	15.375	14.65	13.65			12	16.13	16.75	15.45	14.35	14.25	14.6	17.68	14.3	14.7	10.33	11.1	10.85			12	6.66	7.7425	7.2175	4.885
	16	7.3875	8.45	8.14	6.6825	8.84	8.8125	7.8225	7.44	6.49	7.77	7.265	5.9775		16	23.35	27.125	28.95	14.675	16.325	16.15	27.875	24.875	23.625	16.15	15.175	14.025			16	17.75	20.3	17.05	15.9	16.25	15.3	19.48	16.65	16.93	12.81	10.41	11.33			16	6.9875	8.165	8.2125	5.1825
	20	7.9425	9.11	8.8175	7.245	9.3475	9.3525	8.3875	8.1	6.975	8.06	7.535	6.4925		20	26.25	29.775	31.95	15.875	17.7	17.525	30.125	27.075	26	16.575	15.575	14.75			20	22.73	22.7	19.8	16.73	16.8	16.98	21.28	19.63	19.75	11.57	11	11.69			20	6.6275	7.1925	7.7625	4.8525
	24	8.39	9.995	9.715	7.68	9.95	9.925	8.7425	8.7625	7.5725	8.51	7.965	6.7075		24	29.2	33.175	35.375	16.775	20.225	19.275	33.275	29.075	28.65	16.925	15.7	15.025			24	24.43	24.25	23.05	17.25	15.62	16.74	24.08	21.7	22.63	10.08	12.2	11.94			24	7.5075	8.155	8.7675	5.3875
	28	9.065	11.04	10.3875	8.2175	10.465	10.85	9.29	9.03	8.2075	8.84	8.2975	7.115		28	31.875	36.875	39.3	17.525	21.825	20.9	35.65	31.075	31.125	18.125	16.175	14.85			28	25.75	26.08	24.83	18.24	16.85	17.29	26.58	23.45	24.6	10.87	10.61	11.99			28	8.33	9.8125	10.2525	5.9725
	32	9.6775	12.8475	11.6	9.07	11.125	11.575	10.3175	9.9675	8.835	9.38	8.82	7.4575		32	35.3	40.7	43.025	19.8	23.1	23.675	38.65	33.35	33.7	18.375	16.3	15.125			32	28.35	28.35	27.15	20.26	18.39	19.14	29.2	26.48	27.65	12.71	11.35	11.96			32	9.72	10.6475	12.2	6.43
	36	11.45	14.9	14.525	10.515	12.85	13.625	11.405	11.4525	10.0925	10.15	9.45725	8.17238		36	39.225	45.575	48.375	22.375	24.975	25.45	42.85	36.9	37.35	19.35	17.15	16.1			36	32.3	32.55	30.75	22.53	21.43	21.69	34.3	30.73	33.2	14.02	12.73	11.23			36	14.4675	16.05	16.45	9.2975
	40	11.9625	16	15.05	10.9175	13.2	14.175	11.67	11.8425	10.875	10.19	9.38837	8.19375		40	42.5	49.55	52.25	22.975	26.55	26.225	44.95	39.175	39.95	18.75	16.6	15.7			40	34.68	35.15	32.23	22	20.75	21.49	36.25	32.75	35.9	14.1	12.44	11.04			40	13.06	14.85	15.675	7.925
	44	13.1475	17.725	16.775	11.6375	14.2	15.4	12.5925	12.7325	11.7	10.76	9.81113	8.59037		44	45.85	53.975	57.725	24.025	27.9	27.55	47.625	41.975	42.725	19.275	16.925	15.925			44	38.98	40.13	36.18	22.79	21.34	22.33	40.13	36.15	39.08	14.25	12.96	11.77			44	15.15	16.3	17.225	8.94
	48	15.265	19.625	18.675	13.0575	15.525	16.55	13.325	14.65	12.3525	10.95	10.3598	8.987		48	49.35	59.25	62.6	25.525	29.75	29.375	51.125	44.8	45.6	19.425	17.275	16.15			48	42.95	44.13	40.93	23.58	21.71	22.42	44.5	40.28	43.05	14.76	13.29	12.27			48	16.775	18.625	19.775	9.55
	52	16.8	22.925	21.75	14.35	16.6	18.75	15	16.05	13.3	11.88	10.8775	9.54513		52	53.875	63.85	66.2	27.95	31.775	31.075	55.9	47.675	49.425	20.575	17.45	16.95			52	46.18	48.03	44.98	24.53	22.64	23.56	49.88	44.18	48.28	15.21	13.7	12.78			52	19.225	21.025	21.975	10.485
	56	19.375	26	24.1	15.65	18.775	21.725	16.875	17.125	15.1	12.23	11.3525	10.1555		56	58.15	67.775	70.825	29.7	33.825	33.275	60	51	52.375	21.525	17.775	17.275			56	49.95	51.4	49.05	25.21	23.94	24.84	52.83	48.1	51.98	15.96	14.17	13.32			56	22.125	24.225	25.4	12.96
	60	21.525	29.95	27.5	16.95	21.05	24.55	18.975	19.275	16.675	13.23	12.1837	10.64		60	62.7	72.25	74.9	31.725	35.775	35.225	64.025	54.95	57.45	22.025	17.775	17.625			60	53.43	55.28	52.45	26.14	25.17	25.96	55.8	52.08	55.48	16.68	14.84	13.94			60	28.45	31.725	31.475	16.875
	64	24.1	34.3	31.625	18.85	24.1	26.175	20.65	21.15	18.25	14.01	12.6825	11.2812		64	66.95	75.6	78.75	33.9	38.175	38.225	67.225	59.975	60.85	22.6	18.225	17.95			64	58.03	59.95	56.95	28.05	26.58	26.84	58.93	55.53	58.28	17.11	15.38	14.57			64	29.075	33.775	33.525	17.35
	68	28.1	38.025	35.3	20.375	25.95	28.55	22.4	22.675	19.625	14.65	13.2525	11.495		68	70.425	79.4	82.025	35.925	40.75	41.05	70.475	63.75	64.6	23.725	19.225	18.45			68	62.13	64.2	61.25	29.52	27.57	28.09	61.85	59.05	61.1	18.13	16.05	15.5			68	31.275	35.625	35.325	18.725
	72	30.825	40.675	37.575	22.9	27.55	30.425	24.35	23.95	19.7	13.54	13.0388	10.9725		72	75.225	83.525	85.975	38.275	43.65	43.025	73.6	66.75	67.45	16.925	15.25	12.625			72	63.4	64.43	61.15	29.35	27.48	28.07	60.63	56.23	59.98	16.92	14.2	13.97			72	33.95	38.75	39.25	20.9
	76	34.9	44.275	41.375	24.75	29.375	32.425	26.7	26.55	22.7	14.35	13.4663	11.5188		76	80.15	87.6	89.55	41.15	45.8	46.5	78.55	70.65	70.925	17.2	15.25	12.425			76	67.93	69.93	66.9	29.99	29.52	29.99	64.38	59.95	64.18	18.04	14.98	14.3			76	38.35	40.95	42.325	21.95
	80	38.2	48.75	44.9	27	30.85	34.525	29.75	28.425	24.825	15.27	14.3688	12.4688		80	84.8	91.375	93.125	44	50.275	50.675	83.4	76.25	76.75	18.075	15.775	12.925			80	72.2	72.78	70.53	31.9	30.76	31.42	67.95	62.7	67.65	18.53	15.77	14.91			80	44.225	51.125	51.3	25.05
	84	41.325	52.4	48.425	28.9	32.825	37.375	32.425	31.725	26.6	16.2	15.295	13.015		84	88.15	93.925	95.525	47.5	56.05	55.45	86.825	81.325	80.85	19.85	16.65	13.525			84	76.95	77	75.48	33.79	33.11	33.31	72.2	66.78	72.13	19.72	16.59	15.13			84	45.7	53.025	52.95	24.8
	88	45.525	56.775	52.35	31.275	35.925	40.225	34.825	33.9	28.325	16.98	16.2213	13.3712		88	91.25	95.575	96.9	51.575	59.4	59.4	90.15	85.35	84.35	20.825	17.7	14.075			88	81.88	81.25	80.58	37.84	35.35	36.41	75.63	70.8	76.68	21.36	18.01	16.45			88	46.875	54.7	55.325	23.775
	92	49.175	62.075	56.675	33.375	38.8	42.65	36.95	36.075	31	19.9	17.9788	14.3212		92	93.65	96.825	97.675	56.35	62.775	63.6	93.3	87.95	86.55	22.5	18.375	14.65			92	85.48	86.1	85.6	40.88	38.92	39.86	79.03	73.8	79.98	23.69	19.1	17.88			92	49.05	56.225	58.525	24.8
	96	54.5	67.7	63.55	36.65	42.35	46.9	40.475	38.925	34.325	20.54	17.7199	15.8887		96	95.35	97.725	98	60.65	67.65	67.25	95.2	90.625	89.875	24.15	19.15	16.025			96	89.68	90.43	90.2	46.22	43.1	44.18	81.45	77.88	83.95	25.76	21.63	19.71			96	51.4	60.3	61.35	26.425
	100	58.5	71.95	68.475	40.15	45.125	50.725	41.95	41.6	35.975	21.21	18.8955	16.3637		100	96.4	98.1	98.4	63.925	70.85	70.7	96.775	92.85	92.05	24.975	20.325	16.075			100	93.63	93.48	93.75	48.73	47.04	47.7	82.33	79.38	85.13	26.96	22.69	21.55			100	55.825	65.1	66.575	29.45
	104	62.2	76.575	72.9	42.5	48.175	53.8	45	44.6	38.125	21.84	20.2635	16.9337		104	97.225	98.475	98.675	67.9	73.775	74	97.55	95.1	93.85	26.15	20.675	16.725			104	95.5	95.6	95.78	52.54	49.74	50.53	83.93	79.63	86.43	28.98	24.06	22.35			104	64.15	71.675	73.4	35.35
	108	64.675	78.4	74.8	46	50.025	57.325	48	44.725	38.95	22.4	20.5841	17.9312		108	97.65	98.8	98.95	71.675	76.675	76.9	98.225	96.375	94.2	27.525	23.25	16.925			108	96.52	96.35	96.38	55	52.27	53.15	82.33	79.58	86.3	31.22	25.01	23.62			108	66.35	73.225	75.875	36.025
	112	68.7	82.05	79	48.85	55.175	60.5	52.025	48.3	41.375	23.39	19.7505	18.5487		112	98.05	98.95	99.125	74.775	79.05	80.3	98.625	96.925	95.375	28.075	23.4	17.075			112	96.6	96.9	97.3	56.65	54.76	55.26	83.63	80.45	87.85	33.24	26.79	24.15			112	70.375	76.95	79.55	38.725
	116	71.975	85.625	81.95	51.925	57.9	63.275	56.175	52.225	44.275	24.4	20.4559	17.3137		116	98.3	99.125	99.25	77.175	81.775	83.025	98.9	97.55	96.225	28.6	23.65	17.3			116	97.25	96.78	97.73	60.26	56.76	57.13	84.48	80.95	88.38	36.11	29.08	26.26			116	74.175	78.95	82.4	41.825
	120	76.35	88.325	85.325	55.125	63.05	67.625	60.45	56.025	47.475	25.74	19.7291	18.525		120	98.45	99.2	99.275	79.9	83.975	85.5	99.1	98.075	97.1	28.725	23.925	17.35			120	97.35	97.85	98.1	59.62	56.67	58.28	85.58	82.03	89.38	37.26	31.19	27.59			120	78.325	81.825	85.45	45.75
	124	78.075	89.525	86.4	57.95	66.225	70.9	62.875	58.65	49.1	26.71	23.8545	19.1187		124	98.725	99.275	99.35	82	86.575	87.425	99.15	98.525	97.425	29.725	24.375	17.575			124	98.3	97.78	98.58	60.68	58.72	60.43	85.85	82.85	89.9	38.38	32.02	27.99			124	81.375	86.2	87.775	49.875
	128	79.475	90.45	87.85	60.35	68.3	73.125	65.125	61.1	50.9	25.02	23.6531	19.608		128	98.775	99.325	99.325	84.125	88.025	89.3	99.4	98.65	97.725	30.025	24.875	17.825			128	98.35	98.3	98.7	62.46	60.63	63.21	87.1	83.2	91.13	40.01	32.95	30.11			128	83.45	87.2	90.2	53.725
	132	81.25	91.7	89.65	61.225	70.85	76.175	66.625	64.55	54.825	23.81	21.1014	18.373		132	98.725	99.425	99.4	85.925	89.725	91.4	99.45	98.825	98.45	31.275	25.875	18.925			132	98.98	98.88	99.03	65.8	61.67	65.1	88.28	84.63	92.68	41.53	35.05	32.23			132	86.4	89.05	92.675	57.95
	136	81.65	92.05	89.4	63.775	72.475	77.525	68.4	65.325	56.025	26.14	23.2047	21.052		136	98.95	99.525	99.475	87.675	91.375	93.05	99.525	99.225	98.7	29.925	22.275	16.5			136	98.55	98.23	98.8	62.72	60.74	62.11	85.93	81.95	90.35	38.74	32.98	30.32			136	90.025	91.625	93.725	62.925
	140	83.475	93.075	91.175	66.175	75.15	79.925	72.05	67.95	57.875	25.86	23.2218	20.292		140	99.175	99.55	99.625	89.6	93.15	94.275	99.6	99.45	99.125	30.025	23.125	16.625			140	98.95	98.98	98.98	68.24	63.89	65.89	87.13	83.9	91.7	39.7	34.94	32.05			140	91.95	93.3	95.65	65.9
	144	85	94.05	92.7	69	78.2	82.05	75.4	71.9	61	24.37	23.8716	21.546		144	99.4	99.6	99.675	91.875	94.975	95.475	99.675	99.525	99.3	30.675	23.5	16.975			144	99.13	99.4	99.23	71.08	69.43	68.66	88.18	85.15	92.28	42.5	36.74	33.55			144	94	94.375	96.325	71.025
	148	86.875	95.375	94.325	72.55	80.175	83.675	78.275	74.45	63.2	25.39	24.7437	22.8		148	99.5	99.65	99.675	93.95	96.5	96.55	99.675	99.575	99.425	31.175	23.775	17.15			148	99.35	99.5	99.38	74.18	73.15	72.23	88.98	86.1	93.03	43.78	38.16	34.54			148	94.85	95.35	96.875	74.35
	152	88.475	95.95	95.8	74.45	82.4	85.8	80.2	77	65.025	26.47	25.5987	23.294		152	99.5	99.625	99.675	95.55	96.95	97.225	99.7	99.65	99.5	31.9	24.325	18			152	99.48	99.5	99.45	78.21	77.18	76.3	89.58	86.7	93.63	45.93	39.37	36.24			152	95.35	96.225	96.525	78.35
	156	89.2	96.45	96.525	75.775	83.75	87.6	81.65	78.025	66.7	27.08	26.5905	24.016		156	99.575	99.7	99.7	96.525	97.65	97.675	99.7	99.625	99.625	32.925	25.05	18.475			156	99.53	99.48	99.55	81.38	80.01	80.45	90.45	87.8	94.13	48.24	41.91	38.32			156	95.325	96.175	97.175	81.125
	160	89.875	96.625	96.85	76.975	84.525	88.7	82.925	78.95	67.8	28.21	27.4113	24.776		160	99.65	99.7	99.7	97.1	97.975	97.95	99.725	99.625	99.65	33.4	26.2	19.05			160	99.6	99.53	99.6	85.34	85.52	85.07	91.08	88.43	94.75	50.43	43.8	40.14			160	96.125	97	96.725	83.5
	164	90.4	96.7	96.875	77.85	85.525	89.875	83.85	79.725	68.975	28.8	27.9414	25.08		164	99.6	99.675	99.75	97.45	98.275	98.2	99.7	99.65	99.65	33.375	26.075	19.375			164	99.58	99.58	99.6	87.2	87.68	87.01	91.9	89.1	95.18	53.38	45.35	42.04			164	97.075	96.4	97	86.8
	168	90.175	96.475	96.775	78.5	86.525	90.025	83.8	80.05	69.55	29.78	28.6254	25.707		168	99.65	99.7	99.7	97.7	98.4	98.425	99.675	99.675	99.675	34.15	26.575	19.15			168	99.55	99.58	99.6	89.3	87.87	88.66	92.53	89.75	95.48	54.3	46.8	44.45			168	96.525	96.975	96.2	89.1
	172	90.5	96.275	97.1	78.975	86.6	90.425	84.225	80.425	69.4	30.15	29.1213	26.353		172	99.65	99.775	99.725	97.725	98.675	98.475	99.725	99.675	99.675	34.35	26.825	19.8			172	99.63	99.65	99.65	92.48	90.93	91.43	92.83	90.58	95.78	55.59	47.59	46.03			172	97.425	96.825	94	89.65
	176	90.5	96.525	96.575	79.05	86.7	90.5	83.85	79.875	69.1	30.74	29.7027	26.999		176	99.625	99.675	99.75	98.05	98.875	98.55	99.725	99.65	99.7	34.85	26.8	19.375			176	99.63	99.6	99.63	94.15	94.35	93.85	93.3	91.28	96.15	55.8	47.49	47.22			176	97.35	97.325	96.975	90.6
	180	90.3	96.5	96.375	80.1	86.375	90.425	83.925	79.9	69	31.45	30.267	26.923		180	99.675	99.675	99.55	98.175	98.925	98.7	99.75	99.7	99.6	34.85	27.3	20.175			180	99.6	99.6	99.65	95.28	95.8	95.08	93.73	92.05	96.38	56.52	48.14	46.77			180	97.6	98.075	97.625	92.15
	184	90.025	96.475	96.3	80.525	86.375	90.95	83.825	79.775	68.325	31.9	30.6261	27.379		184	99.725	99.625	99.525	98.3	98.975	98.8	99.75	99.675	99.6	35.475	28.35	20.575			184	99.6	99.65	99.68	96.65	95.1	95.95	94.05	92.45	96.48	56.82	48.27	47.83			184	97.875	97.2	98.25	93.1
	188	90.35	96.325	96.175	80.65	86.5	90.925	83.875	79.825	68.425	32.72	30.8484	27.607		188	99.725	99.7	99.575	98.4	99.05	98.85	99.725	99.725	99.65	35.45	28.425	21.025			188	99.6	99.58	99.73	95.73	95.05	95.7	94.43	92.98	96.68	57.47	48.83	48.01			188	97.1	97	97.975	94.35
	192	90.525	96.35	96.25	81.225	86.475	91.375	83.925	79.575	68.725	33.3	31.6179	28.12		192	99.475	99.725	99.55	98.475	99.075	98.775	99.8	99.75	99.675	36.475	29.325	21.425			192	99.6	99.55	99.65	97.45	95.83	96.08	94.95	93.23	96.85	57.32	49.22	48.01			192	97.275	97.65	98.125	94.725
	196	90.575	96.425	96.375	82.075	87.35	92.1	84.775	79.5	68.875	34.21	32.5071	28.082		196	99.45	99.375	99.525	98.675	99.225	98.975	99.625	99.6	99.475	38.525	31.625	21.8			196	99.63	99.65	99.7	97.18	96.53	96.65	95.48	93.93	97.03	58.21	51.06	50.32			196	96.775	97.475	98.025	95.45
	200	90.95	96.475	96.225	82.425	87.625	91.65	84.475	79.425	68.975	34.21	32.3703	27.759		200	99.5	99.475	99.45	98.75	99.275	99	99.575	99.575	99.5	39	31.375	21.675			200	99.6	99.63	99.7	97.85	97.18	97.03	95.75	94.1	97.08	58.25	51.27	50.74			200	96.675	97.65	97.925	95.925
	204	91.075	96.475	96.275	81.925	87.85	91.675	84.775	79.525	69.05	34.18	32.3019	27.987		204	99.525	99.5	99.4	98.85	99.325	99.05	99.525	99.525	99.525	39.5	31.675	21.725			204	99.68	99.68	99.68	97.75	97.25	96.98	95.5	94.08	96.48	58.21	51.37	51			204	96.95	97.55	97.8	95.8
	208	91.3	96.275	96.5	82.825	88.05	91.625	84.75	79.675	68.875	34.15	32.6097	28.082		208	99.475	99.5	99.5	98.95	99.3	99.125	99.575	99.5	99.55	40.4	31.85	22.225			208	99.65	99.63	99.65	98.23	97.9	97.43	95.25	93.68	96.9	58.22	51.73	51.48			208	97.45	97.775	98.075	95.75
	212	91.25	96.5	96.55	82.95	88.15	92.125	84.85	79.6	69.15	34.27	32.4045	27.797		212	99.475	99.5	99.5	98.95	99.25	99.125	99.525	99.55	99.5	40.875	32.225	22.1			212	99.6	99.6	99.65	98.38	98.9	98.58	95.25	93.77	96.95	58.41	52.17	51.93			212	97	97.55	97.95	96.075
[truncated: 34 more columns]
